# Supplementary material
Source: PubMed Central journal article supplement (PMC6220708)
Supplement: NIHMS969002-supplement-1.pdf [file NIHMS969002-supplement-1.pdf]

## Reporting Summary

Nature Research wishes to improve the reproducibility of the work that we publish. This form provides structure for consistency and transparency in reporting. For further information on Nature Research policies, see [Authors & Referees](#) and the [Editorial Policy Checklist](#).

### Statistical parameters

When statistical analyses are reported, confirm that the following items are present in the relevant location (e.g. figure legend, table legend, main text, or Methods section).

n/a Confirmed

- The exact sample size ( $n$ ) for each experimental group/condition, given as a discrete number and unit of measurement
- An indication of whether measurements were taken from distinct samples or whether the same sample was measured repeatedly
- The statistical test(s) used AND whether they are one- or two-sided  
*Only common tests should be described solely by name; describe more complex techniques in the Methods section.*
- A description of all covariates tested
- A description of any assumptions or corrections, such as tests of normality and adjustment for multiple comparisons
- A full description of the statistics including central tendency (e.g. means) or other basic estimates (e.g. regression coefficient) AND variation (e.g. standard deviation) or associated estimates of uncertainty (e.g. confidence intervals)
- For null hypothesis testing, the test statistic (e.g.  $F$ ,  $t$ ,  $r$ ) with confidence intervals, effect sizes, degrees of freedom and  $P$  value noted  
*Give  $P$  values as exact values whenever suitable.*
- For Bayesian analysis, information on the choice of priors and Markov chain Monte Carlo settings
- For hierarchical and complex designs, identification of the appropriate level for tests and full reporting of outcomes
- Estimates of effect sizes (e.g. Cohen's  $d$ , Pearson's  $r$ ), indicating how they were calculated
- Clearly defined error bars  
*State explicitly what error bars represent (e.g. SD, SE, CI)*

*Our web collection on [statistics for biologists](#) may be useful.*

### Software and code

Policy information about [availability of computer code](#)

|                 |                                                                                                                                                                                             |
|-----------------|---------------------------------------------------------------------------------------------------------------------------------------------------------------------------------------------|
| Data collection | FEI EPU; pClamp v10                                                                                                                                                                         |
| Data analysis   | RELION 2.1; CCP4i v7; Coot 0.8.9; Phenix 1.13-2998; Motioncor2; GCTF v1.06; ResMap v1.1.4; Graphpad Prism v7; pClamp v10; Ligplot+; Chimera v1.11.2; HOLE v2.2.005; Swiss-Model; MolProbity |

For manuscripts utilizing custom algorithms or software that are central to the research but not yet described in published literature, software must be made available to editors/reviewers upon request. We strongly encourage code deposition in a community repository (e.g. GitHub). See the Nature Research [guidelines for submitting code & software](#) for further information.

### Data

Policy information about [availability of data](#)

All manuscripts must include a [data availability statement](#). This statement should provide the following information, where applicable:

- Accession codes, unique identifiers, or web links for publicly available datasets
- A list of figures that have associated raw data
- A description of any restrictions on data availability

Atomic coordinates of the two GABA-A receptor-GABA-flumazenil-Fab complexes have been deposited in the Protein Data Bank (PDB; Conformation A, 6D6U;

Conformation B, 6D6T). The cryo-EM density maps have been deposited in the Electron Microscopy Data Bank (Conformation A, EMD-7817; Conformation B, EMD-7816).

## Field-specific reporting

Please select the best fit for your research. If you are not sure, read the appropriate sections before making your selection.

Life sciences  Behavioural & social sciences  Ecological, evolutionary & environmental sciences

For a reference copy of the document with all sections, see [nature.com/authors/policies/ReportingSummary-flat.pdf](https://www.nature.com/authors/policies/ReportingSummary-flat.pdf)

## Life sciences study design

All studies must disclose on these points even when the disclosure is negative.

|                 |                                                 |
|-----------------|-------------------------------------------------|
| Sample size     | N/A                                             |
| Data exclusions | No data were excluded.                          |
| Replication     | All attempts to replicate data were successful. |
| Randomization   | N/A                                             |
| Blinding        | N/A                                             |

## Reporting for specific materials, systems and methods

### Materials & experimental systems

| n/a                                 | Involvement in the study                                        |
|-------------------------------------|-----------------------------------------------------------------|
| <input type="checkbox"/>            | <input checked="" type="checkbox"/> Unique biological materials |
| <input type="checkbox"/>            | <input checked="" type="checkbox"/> Antibodies                  |
| <input type="checkbox"/>            | <input checked="" type="checkbox"/> Eukaryotic cell lines       |
| <input checked="" type="checkbox"/> | <input type="checkbox"/> Palaeontology                          |
| <input checked="" type="checkbox"/> | <input type="checkbox"/> Animals and other organisms            |
| <input checked="" type="checkbox"/> | <input type="checkbox"/> Human research participants            |

### Methods

| n/a                                 | Involvement in the study                        |
|-------------------------------------|-------------------------------------------------|
| <input checked="" type="checkbox"/> | <input type="checkbox"/> ChIP-seq               |
| <input checked="" type="checkbox"/> | <input type="checkbox"/> Flow cytometry         |
| <input checked="" type="checkbox"/> | <input type="checkbox"/> MRI-based neuroimaging |

## Unique biological materials

Policy information about [availability of materials](#)

|                            |                 |
|----------------------------|-----------------|
| Obtaining unique materials | No restrictions |
|----------------------------|-----------------|

## Antibodies

|                 |                                                                                                                                          |
|-----------------|------------------------------------------------------------------------------------------------------------------------------------------|
| Antibodies used | One monoclonal antibody was generated for this study; we describe its production and characterization in the methods. It is a mouse IgG. |
| Validation      | Validated as described in manuscript by FSEC (binding) and Western blot (negative control).                                              |

## Eukaryotic cell lines

Policy information about [cell lines](#)

|                          |                                    |
|--------------------------|------------------------------------|
| Cell line source(s)      | ATCC CRL-3022 and mouse hybridoma. |
| Authentication           | no authentication                  |
| Mycoplasma contamination | no mycoplasma test                 |

Commonly misidentified lines  
(See [ICLAC](#) register)

N/A
