# Supplementary material
Source: PubMed Central journal article supplement (PMC6220708)

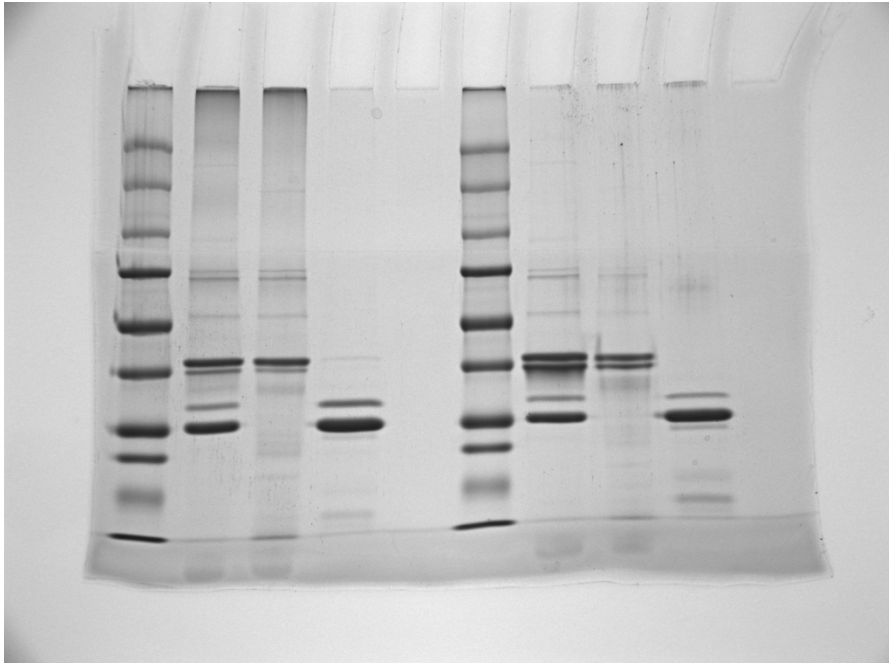

**Supplementary Figure 1: Uncropped gel shown in Extended Data Fig. 2.**

Supplement: NIHMS969002-supplement-2.pdf [file NIHMS969002-supplement-2.pdf]
